# Supplementary material
Source: PubMed Central journal article supplement (PMC9664181)
Supplement: djac150_supplementary_data.pdf [file djac150_supplementary_data.pdf]

Supplementary Table 1 Univariable analysis for risk of 1-year relapse-related and all-cause mortality

| Variable                                              | Relapse-related mortality |                | All-cause mortality |                |
|-------------------------------------------------------|---------------------------|----------------|---------------------|----------------|
|                                                       | sHR (95%CI)               | p-Value        | sHR (95%CI)         | p-Value        |
| Age at HCT                                            | 1.00 (1.00-1.01)          | 0.487          | 1.02 (1.01-1.02)    | <0.001         |
| Sex                                                   |                           |                |                     |                |
| Female                                                | 1.00 (referent)           | — <sup>b</sup> | 1.00 (referent)     | — <sup>b</sup> |
| Male                                                  | 0.88 (0.63-1.22)          | 0.445          | 1.07 (0.83-1.38)    | 0.624          |
| Race and ethnicity                                    |                           | 0.102          |                     | 0.241          |
| Non-Hispanic White                                    | 1.00 (referent)           | — <sup>b</sup> | 1.00 (referent)     | — <sup>b</sup> |
| Hispanic                                              | 1.01 (0.70-1.46)          | 0.954          | 1.15 (0.86-1.53)    | 0.343          |
| Asian                                                 | 1.49 (0.95-2.35)          | 0.085          | 1.47 (1.02-2.12)    | 0.041          |
| Other                                                 | 0.49 (0.20-1.24)          | 0.134          | 1.17 (0.71-1.91)    | 0.544          |
| Insurance status at time of HCT                       |                           | 0.484          |                     | 0.220          |
| Private                                               | 1.00 (referent)           | — <sup>b</sup> | 1.00 (referent)     | — <sup>b</sup> |
| Public                                                | 0.97 (0.68-1.37)          | 0.84           | 1.20 (0.93-1.55)    | 0.172          |
| Uninsured or unknown                                  | 0.57 (0.23-1.42)          | 0.229          | 0.78 (0.40-1.44)    | 0.393          |
| Diagnosis                                             |                           | 0.776          |                     | 0.001          |
| Acute lymphoblastic leukemia                          | 1.00 (referent)           | — <sup>b</sup> | 1.00 (referent)     | — <sup>b</sup> |
| Acute myeloid leukemia                                | 1.28 (0.83-1.96)          | 0.259          | 0.95 (0.68-1.32)    | 0.739          |
| Lymphoma                                              | 1.18 (0.59-2.35)          | 0.650          | 0.80 (0.45-1.44)    | 0.459          |
| Myelodysplastic syndrome                              | 1.13 (0.66-1.93)          | 0.670          | 1.60 (1.12-2.28)    | 0.010          |
| Other                                                 | 0.97 (0.51-1.83)          | 0.919          | 0.63 (0.37-1.09)    | 0.096          |
| Conditioning                                          |                           |                |                     |                |
| Myeloablative                                         | 1.00 (referent)           | — <sup>b</sup> | 1.00 (referent)     | — <sup>b</sup> |
| Reduced intensity                                     | 1.05 (0.76-1.46)          | 0.761          | 1.35 (1.04-1.74)    | 0.022          |
| Risk Relapse                                          |                           |                |                     |                |
| Low                                                   | 1.00 (referent)           | — <sup>b</sup> | 1.00 (referent)     | — <sup>b</sup> |
| High                                                  | 2.04 (1.48-2.83)          | <0.001         | 1.68 (1.31-2.16)    | <0.001         |
| GVHD prophylaxis                                      |                           | 0.424          |                     | 0.032          |
| Tacrolimus/Sirolimus                                  | 1.00 (referent)           | — <sup>b</sup> | 1.00 (referent)     | — <sup>b</sup> |
| Calcineurin inhibitor + MMF or MTX                    | 1.04 (0.67-1.59)          | 0.873          | 1.27 (0.91-1.78)    | 0.166          |
| Post-HCT cyclophosphamide                             | 0.69 (0.42-1.12)          | 0.135          | 1.51 (1.12-2.04)    | 0.007          |
| Other                                                 | 0.54 (0.07-3.96)          | 0.545          | 0.40 (0.05-2.99)    | 0.370          |
| Performance status $\leq$ 80                          | 0.97 (0.95-0.99)          | <0.001         | 0.97 (0.95-0.98)    | <0.001         |
| HCT-CI score                                          | 0.97 (0.89-1.05)          | 0.408          | 1.10 (1.04-1.17)    | 0.001          |
| CMV status                                            |                           |                |                     |                |
| Negative                                              | 1.00 (referent)           | — <sup>b</sup> | 1.00 (referent)     | — <sup>b</sup> |
| Positive                                              | 1.13 (0.69-1.84)          | 0.621          | 1.28 (0.86-1.90)    | 0.232          |
| HLA Match                                             |                           | 0.216          |                     | 0.004          |
| Matched                                               | 1.00 (referent)           | — <sup>b</sup> | 1.00 (referent)     | — <sup>b</sup> |
| Haploidentical                                        | 0.78 (0.44-1.36)          | 0.380          | 1.72 (1.24-2.38)    | 0.001          |
| Mismatched                                            | 1.31 (0.87-1.97)          | 0.194          | 1.31 (0.94-1.81)    | 0.109          |
| Distance to City of Hope                              | 1.00 (1.00-1.00)          | 1.00           | 1.00 (1.00-1.00)    | 0.134          |
| Overall SVI <sup>a</sup>                              | 0.94 (0.67-1.31)          | 0.697          | 1.26 (0.98-1.63)    | 0.070          |
| SVI socioeconomic status <sup>a</sup>                 | 0.87 (0.61-1.25)          | 0.443          | 1.26 (0.97-1.62)    | 0.080          |
| SVI household composition and disability <sup>a</sup> | 0.88 (0.61-1.25)          | 0.467          | 1.24 (0.96-1.60)    | 0.096          |
| SVI minority status and language <sup>a</sup>         | 0.82 (0.57-1.17)          | 0.269          | 1.24 (0.96-1.60)    | 0.100          |
| SVI housing and transportation <sup>a</sup>           | 0.90 (0.63-1.28)          | 0.560          | 1.18 (0.91-1.52)    | 0.215          |

<sup>a</sup>Analysis conducted for highest tertile of SVI compared to lower two tertiles as referent groups

<sup>b</sup>Not applicable

GVHD= graft-versus-host disease; MMF= mycophenolate mofetil; MTX= methotrexate; HCT-CI= hematopoietic cell transplantation-comorbidity index; CMV= cytomegalovirus; HLA= human leukocyte antigen; SVI= social vulnerability index; sHR= subdistribution hazard ratio; CI= confidence interval

Supplementary Table 2 Multivariable analysis for risk of 1-year relapse-related and all-cause mortality<sup>a</sup>

| Covariable                                                                | sHR (95%CI)      | p-Value        |
|---------------------------------------------------------------------------|------------------|----------------|
| Relapse-related mortality                                                 |                  |                |
| Relapse Risk                                                              |                  |                |
| Low                                                                       | 1.00 (referent)  | — <sup>d</sup> |
| High                                                                      | 1.54 (1.35-2.64) | <0.001         |
| Performance status                                                        | 0.97 (0.96-0.99) | <0.001         |
| SVI overall(highest tertile) <sup>b,c</sup>                               | 0.95 (0.67-1.33) | 0.747          |
| SVI socioeconomic status (highest tertile) <sup>b,c</sup>                 | 0.88 (0.62-1.24) | 0.876          |
| SVI household composition and disability (highest tertile) <sup>b,c</sup> | 0.89 (0.63-1.27) | 0.892          |
| SVI minority status and language (highest tertile) <sup>b,c</sup>         | 0.83 (0.59-1.19) | 0.317          |
| SVI housing and transportation (highest tertile) <sup>b,c</sup>           | 0.92 (0.65-1.31) | 0.651          |
| All-cause mortality                                                       |                  |                |
| Age at HCT                                                                | 1.02 (1.01-1.02) | <0.001         |
| Relapse Risk                                                              |                  |                |
| Low                                                                       | 1.00 (referent)  | — <sup>d</sup> |
| High                                                                      | 1.53 (1.19-1.97) | 0.001          |
| Performance status                                                        | 0.97 (0.96-0.98) | <0.001         |
| HCT-CI score                                                              | 1.09 (1.03-1.16) | 0.005          |
| HLA Match                                                                 |                  |                |
| Matched                                                                   | 1.00 (referent)  | — <sup>d</sup> |
| Haploidentical                                                            | 1.89 (1.36-2.63) | <0.001         |
| Mismatched                                                                | 1.50 (1.07-2.10) | 0.019          |
| SVI overall (highest tertile) <sup>b,c</sup>                              | 1.37 (1.05-1.78) | 0.022          |
| SVI socioeconomic status (highest tertile) <sup>b,c</sup>                 | 1.38 (1.06-1.81) | 0.017          |
| SVI household composition and disability (highest tertile) <sup>b,c</sup> | 1.32 (1.02-1.72) | 0.035          |
| SVI minority status and language (highest tertile) <sup>b,c</sup>         | 1.33 (1.01-1.74) | 0.040          |
| SVI housing and transportation (highest tertile) <sup>b,c</sup>           | 1.25 (0.96-1.62) | 0.097          |

<sup>a</sup>Each SVI component was added independently to the baseline clinical model

<sup>b</sup>Reference: lower two SVI tertiles

HCT-CI= hematopoietic cell transplantation-comorbidity index; CMV= cytomegalovirus; HLA= human leukocyte antigen; SVI= social vulnerability index; sHR= subdistribution hazard ratio; CI= confidence interval

<sup>c</sup>SVI overall and SVI themes were each adjusted for the preceding non-SVI variables, but not for each other

<sup>d</sup>Not applicable
